# Supplementary material for: Gastrointestinal Symptoms and FODMAP Intake of Aged-Care Residents from Christchurch, New Zealand
Source: MDPI journal article supplement (doi:10.3390/nu9101083), 2017-09-29
Supplement: s1 [file s1]

**Table S1.** Baseline clinical features of 74 participants who completed GSRS-IBS questionnaire and 30 participants each selected for symptomatic and asymptomatic groups.

| Characteristic                              | 74 Participants | Symptomatic Group (n = 30) | Asymptomatic Group (n = 30) |
|---------------------------------------------|-----------------|----------------------------|-----------------------------|
| Body mass index <sup>a</sup>                |                 |                            |                             |
| Underweight (<18.50 kg/m <sup>2</sup> )     | 10 (14%)        | 2 (7%)                     | 7 (23%)                     |
| Normal (18.50–24.99 kg/m <sup>2</sup> )     | 37 (50%)        | 15 (50%)                   | 14 (47%)                    |
| Overweight (25.00–29.99 kg/m <sup>2</sup> ) | 21 (28%)        | 10 (33%)                   | 7 (23%)                     |
| Obese (≥30.00 kg/m <sup>2</sup> )           | 6 (8%)          | 3 (10%)                    | 2 (7%)                      |
| Regular medications                         |                 |                            |                             |
| Treatment of constipation                   | 38 (51%)        | 17 (57%)                   | 13 (43%)                    |
| Treatment of diarrhoea                      | 8 (11%)         | 5 (17%)                    | 5 (17%)                     |
| Known to cause constipation                 | 23 (31%)        | 10 (33%)                   | 8 (27%)                     |
| Known to cause diarrhoea                    | 5 (7%)          | 2 (7%)                     | 3 (10%)                     |
| Comorbidities                               |                 |                            |                             |
| Cardiovascular                              | 55 (74%)        | 22 (73%)                   | 23 (77%)                    |
| Central nervous                             | 39 (50%)        | 17 (57%)                   | 16 (53%)                    |
| Respiratory                                 | 19 (26%)        | 7 (23%)                    | 8 (27%)                     |
| Thyroid                                     | 8 (11%)         | 2 (7%)                     | 4 (13%)                     |
| Musculoskeletal                             | 42 (57%)        | 17 (57%)                   | 17 (57%)                    |
| Diabetes                                    | 14 (19%)        | 6 (20%)                    | 5 (17%)                     |
| Cognitive                                   | 25 (34%)        | 10 (33%)                   | 9 (30%)                     |
| Psychiatric                                 | 17 (23%)        | 7 (23%)                    | 7 (23%)                     |
| Cancer                                      | 22 (30%)        | 10 (33%)                   | 6 (20%)                     |
| Lower GI disorder                           | 15 (20%)        | 8 (27%)                    | 5 (17%)                     |
| Function levels                             |                 |                            |                             |
| Continent of bowels                         | 53 (72%)        | 21 (70%)                   | 20 (67%)                    |
| Partial continence                          | 5 (7%)          | 4 (13%)                    | 0 (0%)                      |
| Incontinent                                 | 15 (20%)        | 4 (13%)                    | 10 (33%)                    |
| Colostomy                                   | 1 (1%)          | 1 (3%)                     | 0 (0%)                      |
| Able to mobilise                            | 54 (73%)        | 21 (70%)                   | 20 (67%)                    |
| Bed/chairbound                              | 20 (27%)        | 9 (30%)                    | 10 (33%)                    |
| Normal swallow                              | 64 (86%)        | 25 (81%)                   | 27 (90%)                    |
| Dysphagia (on pureed diet)                  | 10 (14%)        | 5 (19%)                    | 3 (10%)                     |

Notes: <sup>a</sup> WHO age-independent BMI classification [25].

**Table S2.** Number of symptomatic and asymptomatic participants reporting any discomfort and moderate to severe discomfort in the GSRS-IBS questionnaire.

| GSRS-IBS Subdomains and Individual Questions | Symptomatic Group (n = 30)    |                                              | Asymptomatic Group (n = 30)   |                                              |
|----------------------------------------------|-------------------------------|----------------------------------------------|-------------------------------|----------------------------------------------|
|                                              | Score ≥ 2 (Any Discomfort), n | Score ≥ 4 (Moderate to Severe Discomfort), n | Score ≥ 2 (Any Discomfort), n | Score ≥ 4 (Moderate to Severe Discomfort), n |
| Pain (Q1 or 2)                               | 15 (50%)                      | 11 (37%)                                     | 1 (3%)                        | 0                                            |
| Q1 abdo. Pain                                | 15                            | 11                                           | 1                             | 0                                            |
| Q2 pain relieved by BM                       | 8                             | 3                                            | 0                             | 0                                            |
| Bloating (Q3, 4 or 13)                       | 24 (80%)                      | 3 (10%)                                      | 7 (23%)                       | 1 (3%)                                       |
| Q3 bloating                                  | 15                            | 3                                            | 5                             | 1                                            |
| Q4 passing gas                               | 16                            | 2                                            | 4                             | 0                                            |
| Q13 abdo. distention                         | 6                             | 0                                            | 0                             | 0                                            |
| Constipation (Q5 or 8)                       | 17 (57%)                      | 8 (27%)                                      | 8 (27%)                       | 3 (10%)                                      |
| Q5 constipation                              | 14                            | 6                                            | 8                             | 3                                            |
| Q8 hard stools                               | 14                            | 6                                            | 1                             | 0                                            |
| Diarrhoea (Q6, 7, 9 or 10)                   | 24 (80%)                      | 10 (33%)                                     | 6 (20%)                       | 0                                            |
| Q6 diarrhoea                                 | 4                             | 0                                            | 1                             | 0                                            |
| Q7 loose stools                              | 16                            | 4                                            | 5                             | 0                                            |
| Q9 urgency                                   | 8                             | 6                                            | 3                             | 0                                            |
| Q10 incomplete BM                            | 15                            | 6                                            | 0                             | 0                                            |
| Satiety (Q11 or 12)                          | 15 (50%)                      | 3 (10%)                                      | 5 (17%)                       | 2 (7%)                                       |
| Q11 early satiety                            | 11                            | 2                                            | 4                             | 2                                            |
| Q12 prolonged satiety                        | 8                             | 2                                            | 1                             | 0                                            |

Abbreviations: GSRS-IBS, IBS specific Gastrointestinal Symptom Rating Scale; abdo., abdominal; BM, bowel movement; GI, gastrointestinal. Notes:  $n$  (%) for each of six subdomains (highlighted) was determined by adding the number of participants who scored  $\geq 2$  or  $\geq 4$  for any of the relevant questions under each subdomain.

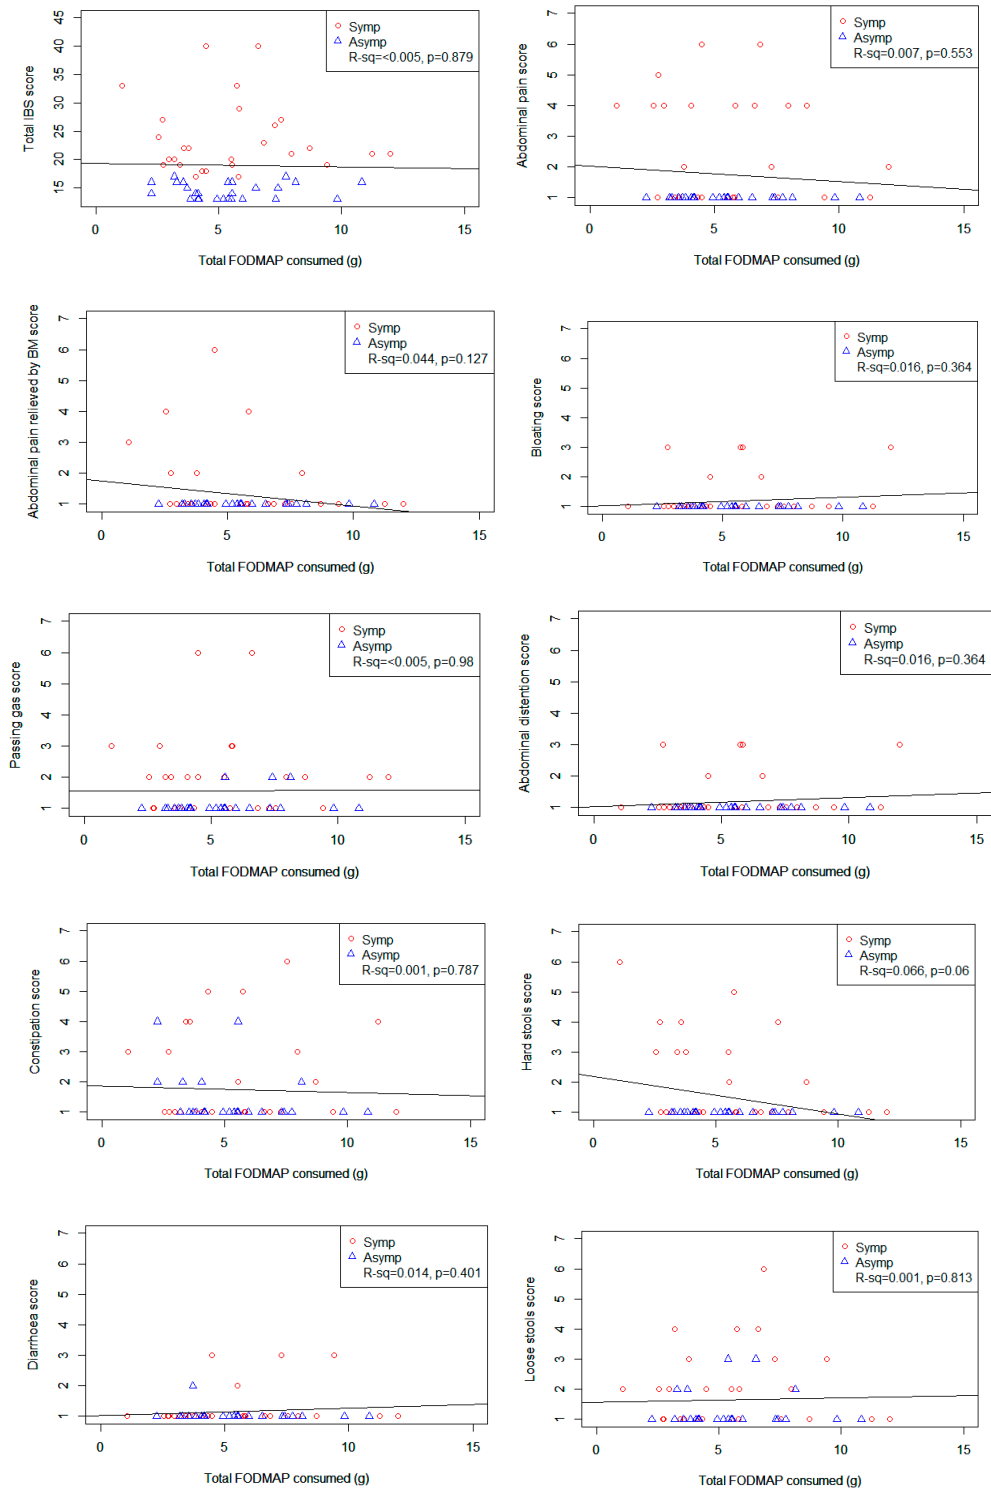

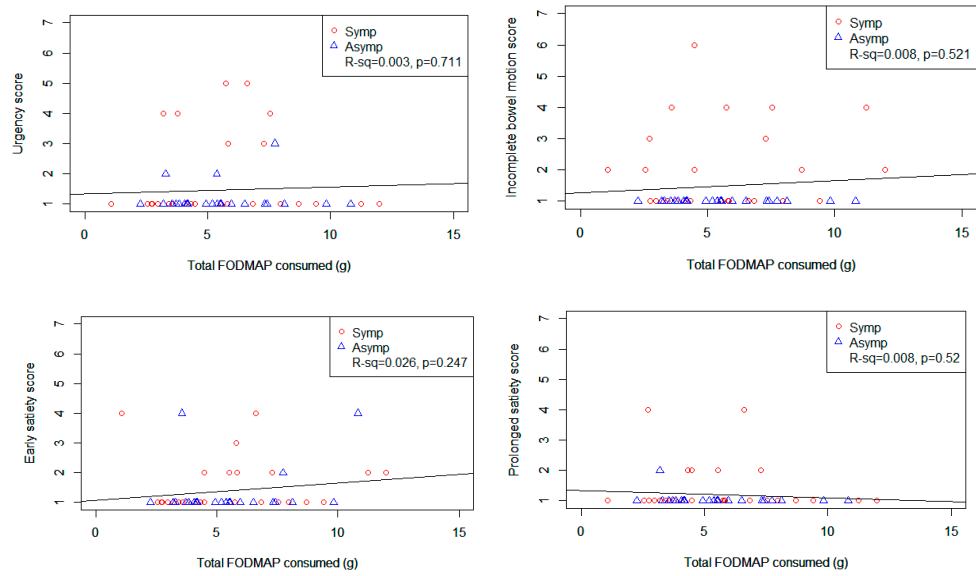

**Figure S1.** Scatter plots with linear regressions of total FODMAP intake excluding lactose and various IBS symptom scores. Presented R-squared and *p*-values indicate the significance of the association between total FODMAP intake and IBS symptom score.
